# Supplementary material
Source: publisher figshare collection journal article supplement (https://asha.figshare.com/articles/dataset/_/26237060)

**Supplemental Material S1.** Panel (A) shows the average pure-tone thresholds for 128 participants across 8 frequencies of 0.25, 0.5, 1, 2, 3, 4, 6, and 8 kHz for the right (red squares) and left (blue circles). Error bars show the confidence level of data around mean (i.e., the deviation along the mean values). Panel (B) shows the relationship between age on the *x*-axis and pure-tone average (dB HL) on the left *y*-axis (in green) and average WIN threshold (dB S/N) on the right *y*-axis (in medium orchid).

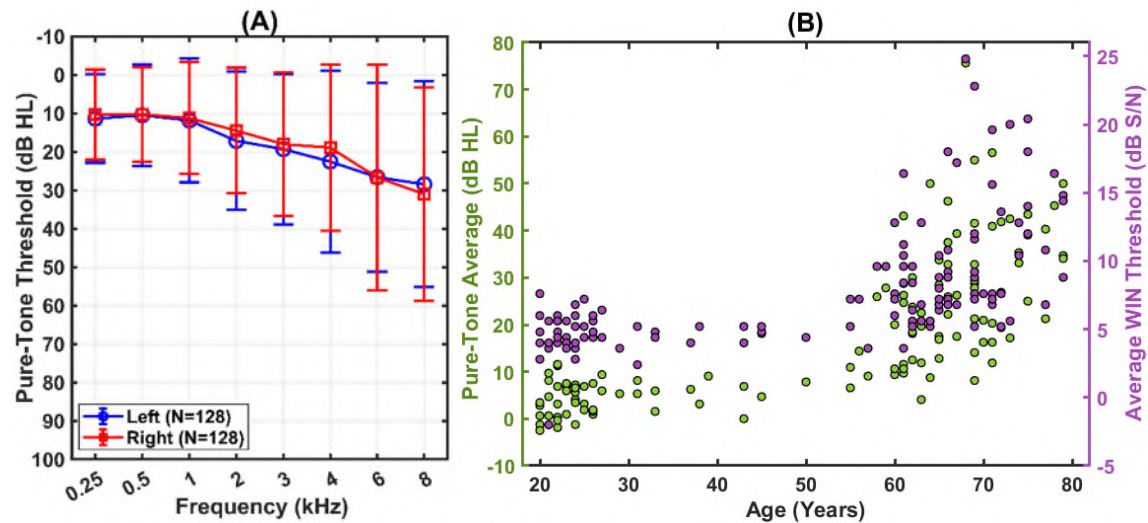

Supplement: Supplementary file 1 [file 1]
