# Supplementary material
Source: publisher figshare collection journal article supplement (https://asha.figshare.com/articles/dataset/_/26237060)
Supplement: Supplementary file 2 [file 1]

**Supplemental Material S2.** Results of mediation analysis using bootstrapping to test whether PROMIS-57 social score serves as a mediator in linking WIN Thresholds to MoCA score. The model parameters are presented for the Initial Model (MoCA score ~ WIN Threshold), Mediation Model (MoCA score ~ WIN threshold + PROMIS-57 Social Score), and Bootstrap Analysis of Indirect Effect via PROMIS-57 social score.

| Parameter                                                                   | Estimate<br>( $\beta$ ) | 95% CI         | <i>p</i>  |
|-----------------------------------------------------------------------------|-------------------------|----------------|-----------|
| <b>Initial Model:</b> MoCA score ~ WIN threshold                            |                         |                |           |
| Intercept                                                                   | 28.6                    | [0.72, 27.85]  | .000      |
| MoCA score ~ WIN threshold                                                  | -2.48                   | [-0.40, -0.22] | < .000*** |
| <b>Mediation Model:</b> MoCA score ~ WIN threshold + PROMIS-57 social score |                         |                |           |
| Intercept                                                                   | 29.8                    | [26.53, 33]    | .000      |
| WIN threshold                                                               | -2.49                   | [-0.42, -0.22] | < .000*** |
| PROMIS-57 social score                                                      | -0.015                  | [-0.10, 0.07]  | .73       |
| <b>Bootstrap Analysis</b>                                                   |                         |                |           |
| Indirect Effect of PROMIS-57 as a Mediator                                  | -0.015                  | [-0.08, 0.07]  | .72       |
